# Supplementary material
Source: Springer Nature journal article supplement (https://www.springermedizin.de/resource/supplementary/12985_2013_2151_MOESM1_ESM.pdf/9606168)
Supplement: MOESM1 [file 9606168]

Figure S1

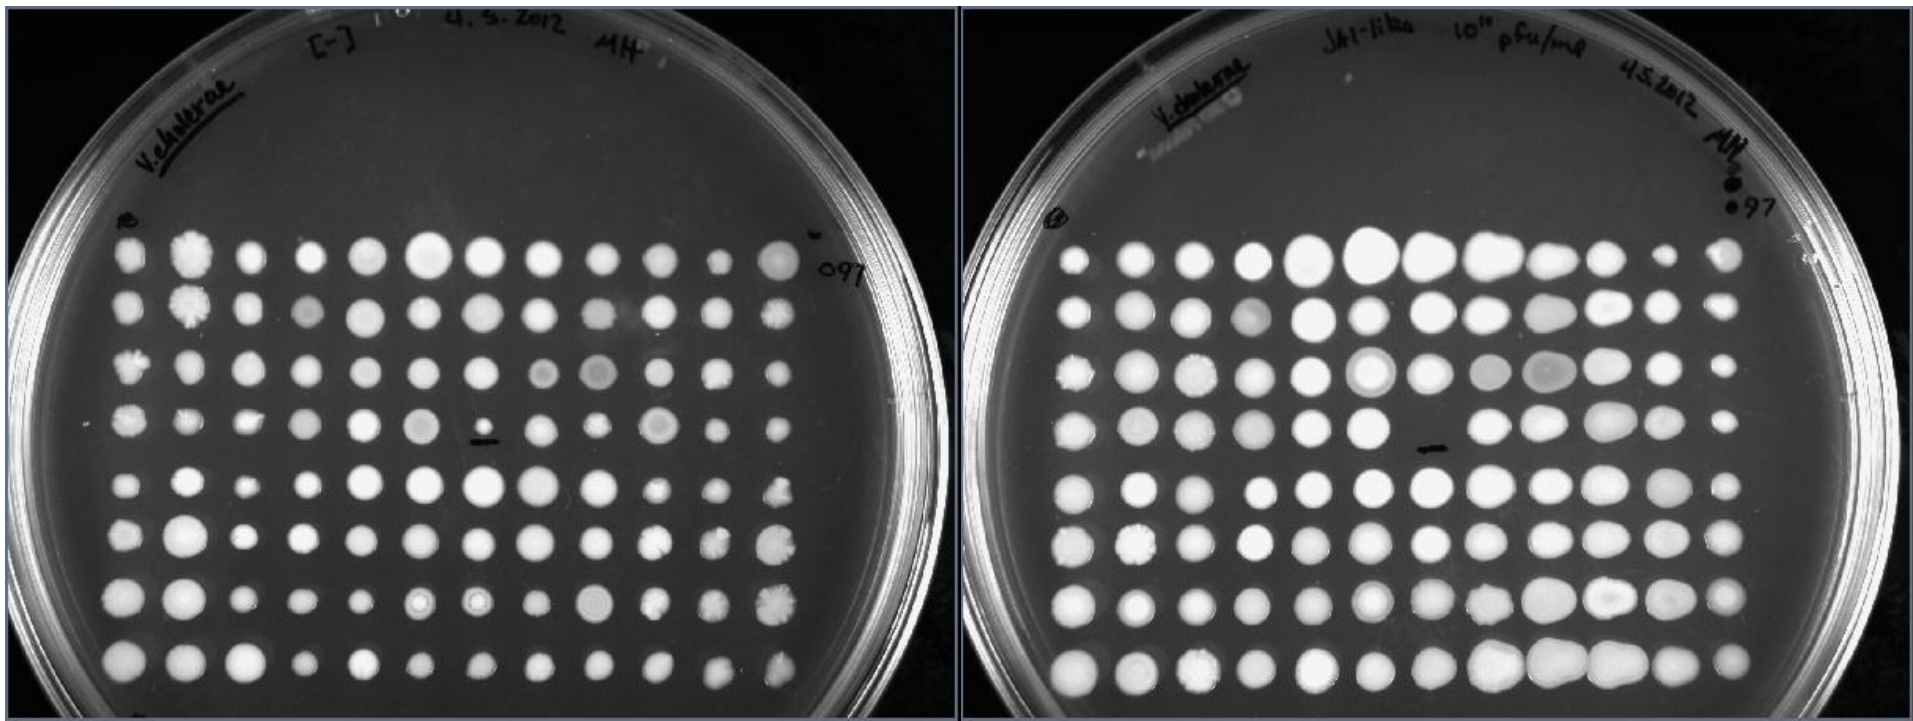

**Figure S2**

**A.**

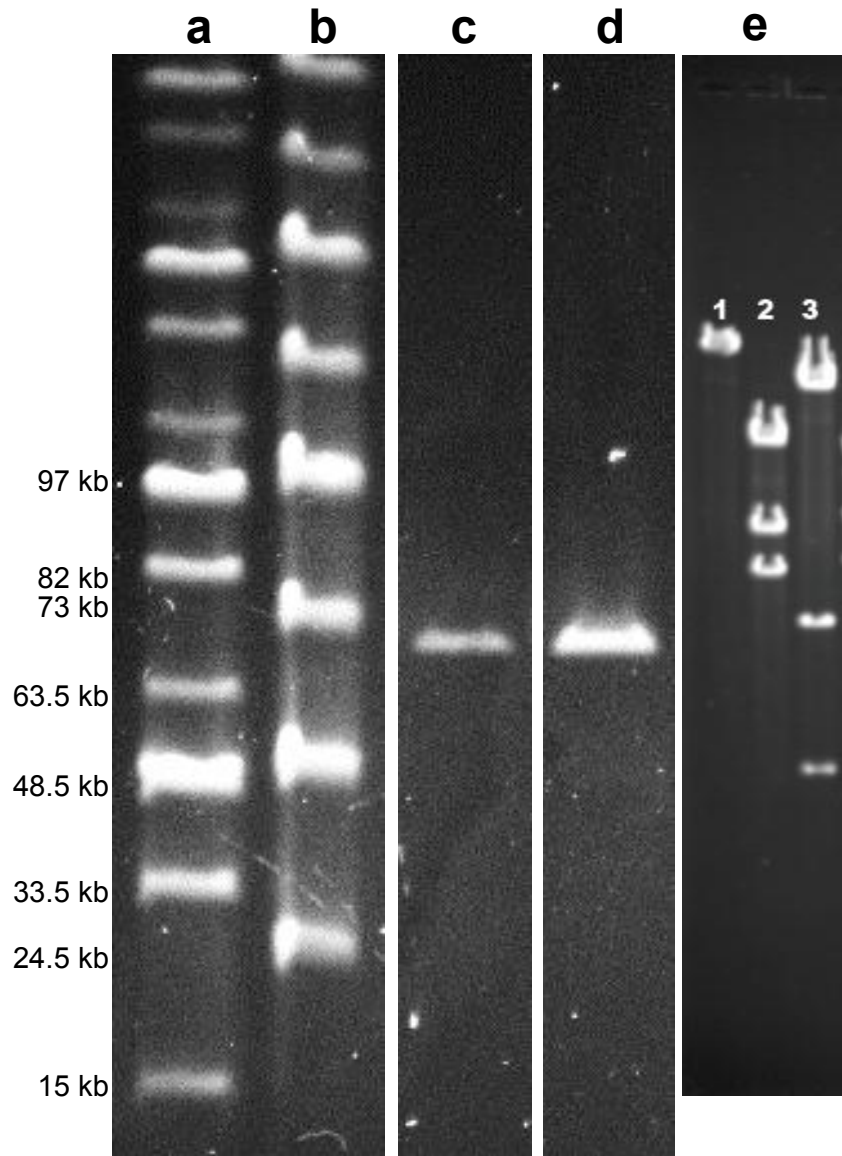

**B.**

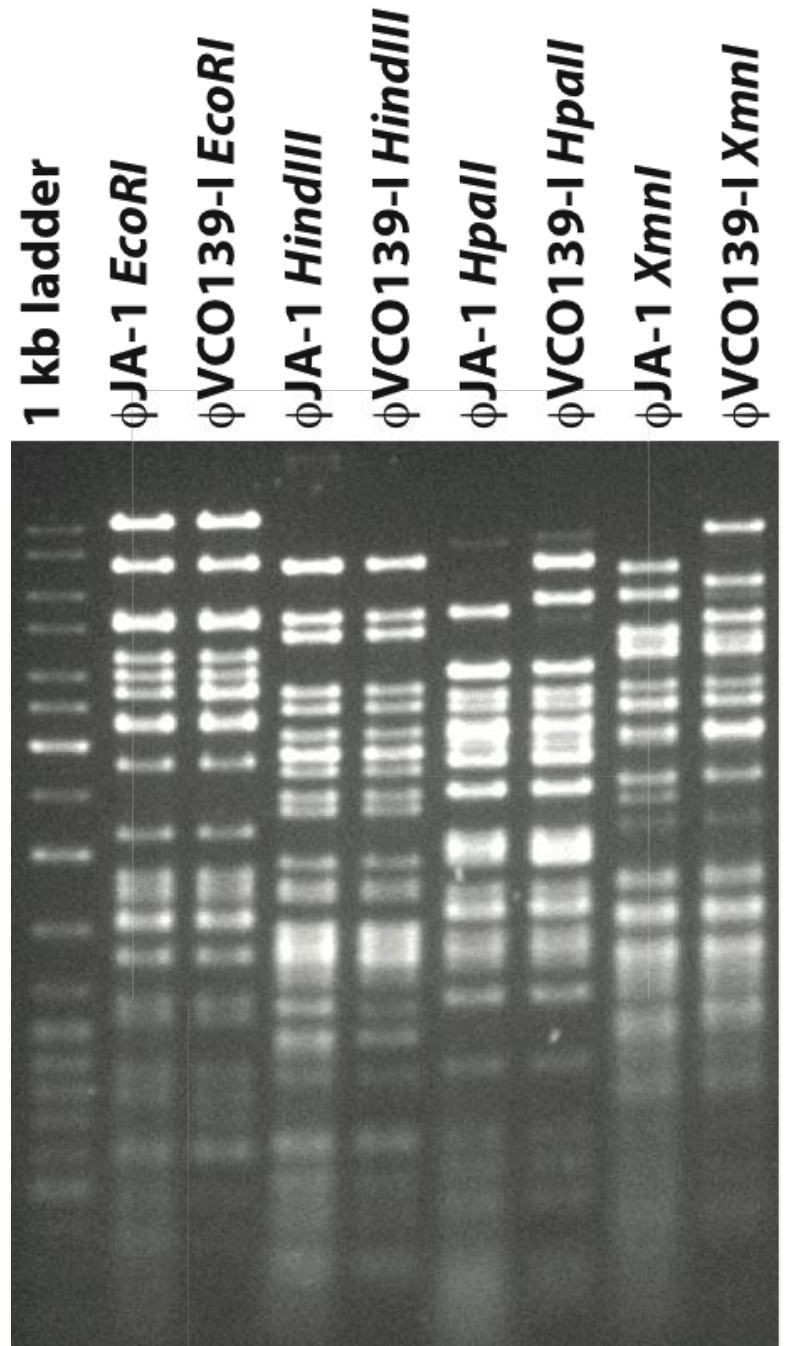



# Figure S4

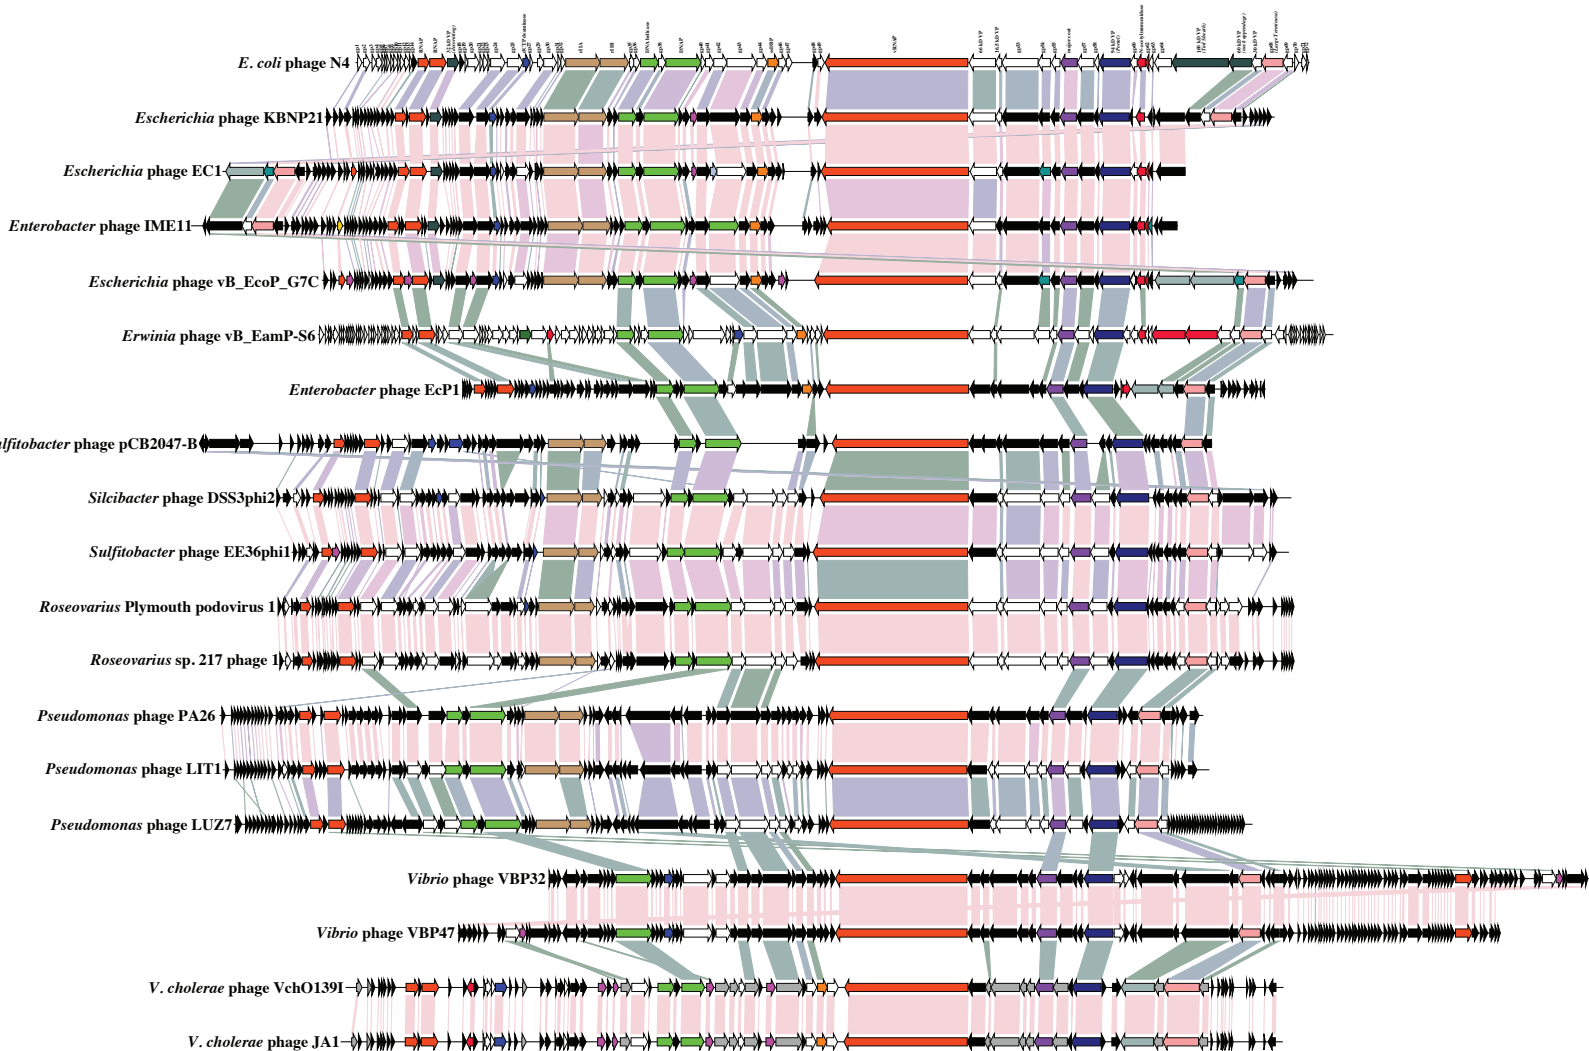

| Capsid structural components and assembly                                                                                                                                                                                                                                                                                                                                                                                                                                                                                                                                                                                                                                                                          | Tail and baseplate assembly                                                                                                                                                                                                                                                                                                                                                                                                                                                                                                                             | DNA metabolism                                                                                                                                                                                                                                                                                                                                                                                                                                                                                                                                                                                                                                                                                                                                                                                                                                                                                                               |
|--------------------------------------------------------------------------------------------------------------------------------------------------------------------------------------------------------------------------------------------------------------------------------------------------------------------------------------------------------------------------------------------------------------------------------------------------------------------------------------------------------------------------------------------------------------------------------------------------------------------------------------------------------------------------------------------------------------------|---------------------------------------------------------------------------------------------------------------------------------------------------------------------------------------------------------------------------------------------------------------------------------------------------------------------------------------------------------------------------------------------------------------------------------------------------------------------------------------------------------------------------------------------------------|------------------------------------------------------------------------------------------------------------------------------------------------------------------------------------------------------------------------------------------------------------------------------------------------------------------------------------------------------------------------------------------------------------------------------------------------------------------------------------------------------------------------------------------------------------------------------------------------------------------------------------------------------------------------------------------------------------------------------------------------------------------------------------------------------------------------------------------------------------------------------------------------------------------------------|
| <ul style="list-style-type: none"> <li><span style="display: inline-block; width: 15px; height: 10px; background-color: #f08080; border: 1px solid black; margin-right: 5px;"></span> large terminase</li> <li><span style="display: inline-block; width: 15px; height: 10px; background-color: #800080; border: 1px solid black; margin-right: 5px;"></span> major capsid</li> <li><span style="display: inline-block; width: 15px; height: 10px; background-color: #4169e1; border: 1px solid black; margin-right: 5px;"></span> portal</li> <li><span style="display: inline-block; width: 15px; height: 10px; background-color: #2f4f4f; border: 1px solid black; margin-right: 5px;"></span> other</li> </ul> | <ul style="list-style-type: none"> <li><span style="display: inline-block; width: 15px; height: 10px; background-color: #add8e6; border: 1px solid black; margin-right: 5px;"></span> structural protein</li> <li><span style="display: inline-block; width: 15px; height: 10px; background-color: #40e0d0; border: 1px solid black; margin-right: 5px;"></span> tail component</li> </ul>                                                                                                                                                              | <ul style="list-style-type: none"> <li><span style="display: inline-block; width: 15px; height: 10px; background-color: #90ee90; border: 1px solid black; margin-right: 5px;"></span> replication</li> <li><span style="display: inline-block; width: 15px; height: 10px; background-color: #ffa500; border: 1px solid black; margin-right: 5px;"></span> DNA binding</li> <li><span style="display: inline-block; width: 15px; height: 10px; background-color: #4169e1; border: 1px solid black; margin-right: 5px;"></span> nucleotides</li> </ul>                                                                                                                                                                                                                                                                                                                                                                         |
|                                                                                                                                                                                                                                                                                                                                                                                                                                                                                                                                                                                                                                                                                                                    | Host cell lysis                                                                                                                                                                                                                                                                                                                                                                                                                                                                                                                                         | Other                                                                                                                                                                                                                                                                                                                                                                                                                                                                                                                                                                                                                                                                                                                                                                                                                                                                                                                        |
|                                                                                                                                                                                                                                                                                                                                                                                                                                                                                                                                                                                                                                                                                                                    | <ul style="list-style-type: none"> <li><span style="display: inline-block; width: 15px; height: 10px; background-color: #ff4500; border: 1px solid black; margin-right: 5px;"></span> endolysin/lysin</li> <li><span style="display: inline-block; width: 15px; height: 10px; background-color: #ff0000; border: 1px solid black; margin-right: 5px;"></span> holin</li> <li><span style="display: inline-block; width: 15px; height: 10px; background-color: #8b4513; border: 1px solid black; margin-right: 5px;"></span> lysis inhibition</li> </ul> | <ul style="list-style-type: none"> <li><span style="display: inline-block; width: 15px; height: 10px; background-color: #ffa500; border: 1px solid black; margin-right: 5px;"></span> transcription</li> <li><span style="display: inline-block; width: 15px; height: 10px; background-color: #808080; border: 1px solid black; margin-right: 5px;"></span> conserved hypothetical</li> <li><span style="display: inline-block; width: 15px; height: 10px; background-color: #000000; border: 1px solid black; margin-right: 5px;"></span> hypothetical protein</li> <li><span style="display: inline-block; width: 15px; height: 10px; background-color: #800080; border: 1px solid black; margin-right: 5px;"></span> intron/intein</li> <li><span style="display: inline-block; width: 15px; height: 10px; background-color: #ffffff; border: 1px solid black; margin-right: 5px;"></span> other (not defined)</li> </ul> |
| <p><b>BLASTP</b>      100      35% identity</p>                                                                                                                                                                                                                                                                                                                                                                                                                                                                                                                                                                                                                                                                    |                                                                                                                                                                                                                                                                                                                                                                                                                                                                                                                                                         |                                                                                                                                                                                                                                                                                                                                                                                                                                                                                                                                                                                                                                                                                                                                                                                                                                                                                                                              |





Table S3. Comparison of Miscellaneous features between N4-like Phages and Coliphages

| Phage                                   | Accession | Size (bp) | Length of DTRs (bp)                         | # tRNAs | tRNA type*                                                              | #homing endo | #>5 polyA | #>5 polyT | #>5 polyG | #>5 polyC | Total | #HT/bp      | pA/# | pT/# | pG/# | pC/# |
|-----------------------------------------|-----------|-----------|---------------------------------------------|---------|-------------------------------------------------------------------------|--------------|-----------|-----------|-----------|-----------|-------|-------------|------|------|------|------|
| <i>E. coli</i> phage KBNP21             | JX415535  | 69855     | Not Determined                              | 1       | Ile                                                                     | 1            | 11        | 11        | 2         | 1         | 25    | 0.000357884 | 7/1  | 7/3  | 6/2  | 7/1  |
| <i>E. coli</i> phage N4                 | EF056009  | 70153     | 390-440 + 3' ss extension                   | 4       | Asn,Ser,Thr,Pro                                                         | 1            | 11        | 13        | 0         | 1         | 25    | 0.000356364 | 8/1  | 7/2  | 0    | 9/1  |
| <i>E. coli</i> phage EC1                | KC206276  | 70831     | Not Determined                              | 0       | NA                                                                      | 2            | 9         | 13        | 4         | 3         | 29    | 0.000409425 | 6/9  | 7/3  | 6/4  | 7/1  |
| <i>E. coli</i> phage vB_EcoP_G7C        | HQ259105  | 72917     | 1160                                        | 0       | NA                                                                      | 5            | 11        | 11        | 2         | 5         | 29    | 0.000397712 | 6/11 | 7/3  | 6/2  | 7/2  |
| <i>Enterobacter</i> phage EcP1          | HQ641380  | 59080     | Not Determined                              | 3       | Asn,Pro,Met                                                             | 0            | 37        | 37        | 0         | 2         | 76    | 0.001286391 | 8/1  | 10/1 | 0    | 9/1  |
| <i>Enterobacter</i> phage IME11         | JX880034  | 72570     | Not Determined                              | 2       | Undet, Ile                                                              | 0            | 12        | 8         | 6         | 1         | 27    | 0.000372055 | 7/2  | 6/8  | 7/2  | 6/1  |
| <i>Erwinia</i> phage vB_EamP-S6         | HQ728266  | 74669     | 396                                         | 0       | NA                                                                      | 0            | 8         | 12        | 0         | 2         | 22    | 0.000294634 | 7/1  | 8/1  | 0    | 9/2  |
| <i>Pseudomonas</i> phage PA26           | JX194238  | 72321     | Not Determined                              | 0       | NA                                                                      | 1            | 5         | 6         | 2         | 2         | 15    | 0.000207409 | 7/1  | 7/3  | 7/1  | 7/1  |
| <i>Pseudomonas</i> phage LIT1           | FN422399  | 72544     | 632-665                                     | 0       | NA                                                                      | 1            | 6         | 5         | 2         | 2         | 15    | 0.000206771 | 7/1  | 11/1 | 6/2  | 7/2  |
| <i>Pseudomonas</i> phage LUZ7           | FN422398  | 74901     | 632-665                                     | 0       | NA                                                                      | 0            | 4         | 5         | 2         | 4         | 15    | 0.000200264 | 7/1  | 7/1  | 6/2  | 7/3  |
| <i>Roseovarius</i> sp. 217 phage 1      | FR682616  | 74583     | Not Determined                              | 3       | Pro,Ile,Gln                                                             | 1            | 9         | 8         | 2         | 2         | 21    | 0.000281566 | 6/9  | 6/8  | 7/1  | 7/1  |
| <i>Roseovarius</i> Plymouth podovirus 1 | FR719956  | 74704     | Not Determined                              | 3       | Pro,Ile,Gln                                                             | 1            | 8         | 7         | 2         | 3         | 20    | 0.000267723 | 6/8  | 6/7  | 7/1  | 7/1  |
| <i>Silicibacter</i> phage DSS3phi2      | FJ591093  | 74611     | Not Determined                              | 3       | Pro,Met,Ser                                                             | 1            | 18        | 11        | 6         | 4         | 39    | 0.000522711 | 9/1  | 7/2  | 6/6  | 6/4  |
| <i>Sulfitobacter</i> phage EE36phi1     | FJ591094  | 73325     | Not Determined                              | 3       | Pro,Ile,Ser                                                             | 1            | 20        | 12        | 3         | 10        | 45    | 0.000613706 | 7/2  | 7/2  | 6/3  | 7/4  |
| <i>Sulfitobacter</i> phage pCB2047-B    | HQ317387  | 74480     | Not Determined                              | 13      | Met,Tyr,Trp,Leu,Cys,Thr,Pro,Asn,Ile,Lys,Phe,Gln,Arg                     | 0            | 8         | 11        | 4         | 4         | 27    | 0.000362513 | 6/8  | 6/11 | 7/2  | 7/1  |
| <i>Vibrio</i> phage VBP32               | HQ634196  | 76718     | Not Determined                              | 1       | Trp                                                                     | 3            | 11        | 13        | 3         | 1         | 28    | 0.000364973 | 10/1 | 7/2  | 9/1  | 6/1  |
| <i>Vibrio</i> phage VBP47               | HQ634194  | 76705     | Not Determined                              | 1       | Trp                                                                     | 3            | 13        | 12        | 1         | 3         | 29    | 0.000378072 | 7/2  | 10/1 | 6/1  | 10/1 |
| <i>V. cholerae</i> phage JA1            | JA1       | 69755     | 1974                                        | 1       | Arg                                                                     | 4            | 19        | 19        | 2         | 3         | 43    | 0.000616443 | 8/1  | 11/1 | 6/2  | 7/1  |
| <i>V. cholerae</i> phage VchO139I       | VchO139I  | 68964     | 1974                                        | 1       | Arg                                                                     | 4            | 18        | 18        | 2         | 3         | 41    | 0.000594513 | 8/1  | 12/1 | 6/2  | 7/1  |
| Lambda                                  | JO2459    | 48502     | cos                                         | 0       | NA                                                                      | ?            | 40        | 36        | 5         | 2         | 83    | 0.00171127  | 8/2  | 8/1  | 7/1  | 6/2  |
| Mu                                      | AF083977  | 36717     | variable                                    | 0       | NA                                                                      | ?            | 30        | 16        | 6         | 3         | 55    | 0.001497944 | 7/4  | 7/3  | 6/6  | 7/1  |
| P1                                      | AF234172  | 94800     | circular                                    | 3       | Asn,Thr,Met                                                             | ?            | 60        | 71        | 3         | 5         | 139   | 0.001466245 | 8/5  | 8/2  | 6/3  | 8/1  |
| T1                                      | AY216660  | 48836     |                                             | 0       | NA                                                                      | 1            | 35        | 29        | 2         | 0         | 66    | 0.001351462 | 7/6  | 8/2  | 7/1  | 0    |
| T4                                      | AF158101  | 168903    | circular permutation and terminal redundant | 8       | Gln,Leu,Gly,Pro,Ser,Thr,Met,Arg                                         | 15           | 79        | 112       | 0         | 0         | 191   | 0.001130827 | 8/1  | 7/2  | 0    | 0    |
| T5                                      | AY543070  | 121750    |                                             | 23      | Arg,Ser,Met,Tyr,Glu,Phe,Cys,Asn,Asp,Pro,Lys,Val,Ala,Leu,Gln,Gly,Thr,Ile | ?            | 33        | 63        | 0         | 4         | 100   | 0.000821355 | 6/33 | 7/1  | 0    | 0    |
| T7                                      | GU071091  | 39778     |                                             | 0       | NA                                                                      | ?            | 0         | 1         | 0         | 0         | 1     | 2.51395E-05 | 0    | 6/1  | 0    | 0    |

Homopolymeric Tracts > 9 nucleotides

Highest number of homopolymeric nucleotides
